# Supplementary material
Source: MDPI journal article supplement (https://www.mdpi.com/2071-1050/14/21/14454)
Supplement: s1 [file s1]

## Supplementary Material

**Table S1.** Physicochemical properties of initial composting materials.

| Parameters                             | Human feces           | Rice bran |
|----------------------------------------|-----------------------|-----------|
| Moisture content (%)                   | 92.45                 | 10.42     |
| VS (%)                                 | 65.45                 | 85.52     |
| pH                                     | 6.97                  | 7.74      |
| Electrical conductivity (ms/cm)        | 13.67                 | -         |
| SCOD (g/kg)                            | 127.14                | -         |
| TP (g/kg)                              | 2.50                  | -         |
| NH <sub>4</sub> <sup>+</sup> -N (g/kg) | 78.86                 | -         |
| K (g/kg)                               | 6.21                  | -         |
| Fe (g/kg)                              | 8.07                  | -         |
| As (g/kg)                              | $2.18 \times 10^{-2}$ | -         |
| Sn (g/kg)                              | $4.97 \times 10^{-2}$ | -         |
| Cu (g/kg)                              | ND <sup>a</sup>       | -         |
| Cr (g/kg)                              | ND                    | -         |
| Cd (g/kg)                              | ND                    | -         |

<sup>a</sup>, ND, not detectable

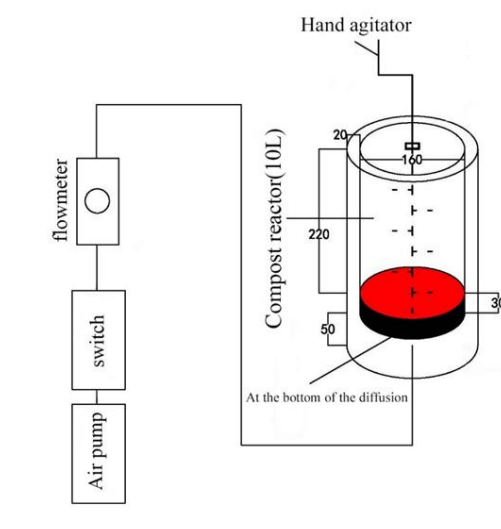

**Figure S1.** Schematic diagram of an aerobic composting reactor.

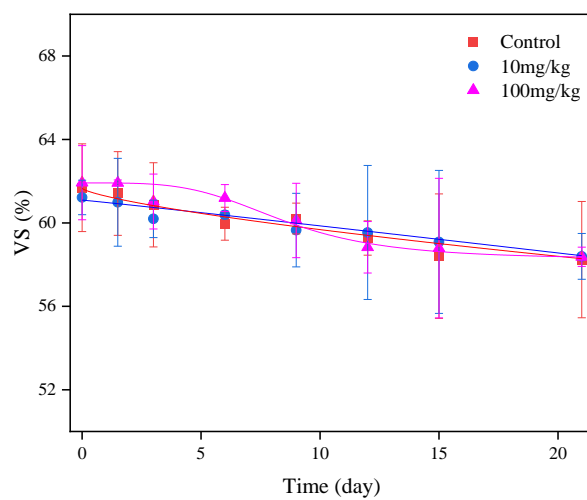

**Figure S2.** VS changes in the control, 10-mg/kg and 100-mg/kg groups during human feces composting.

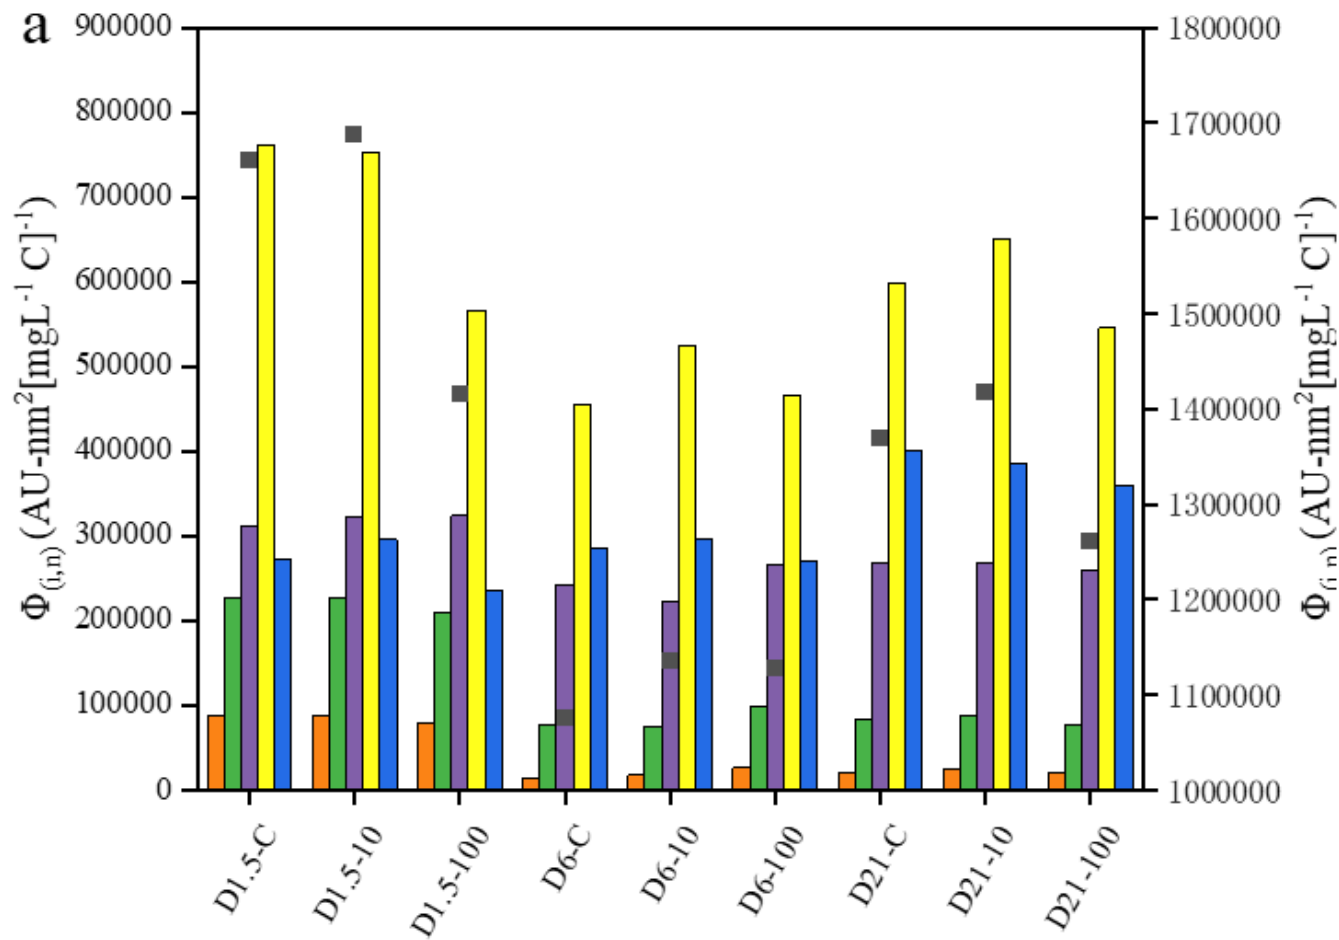

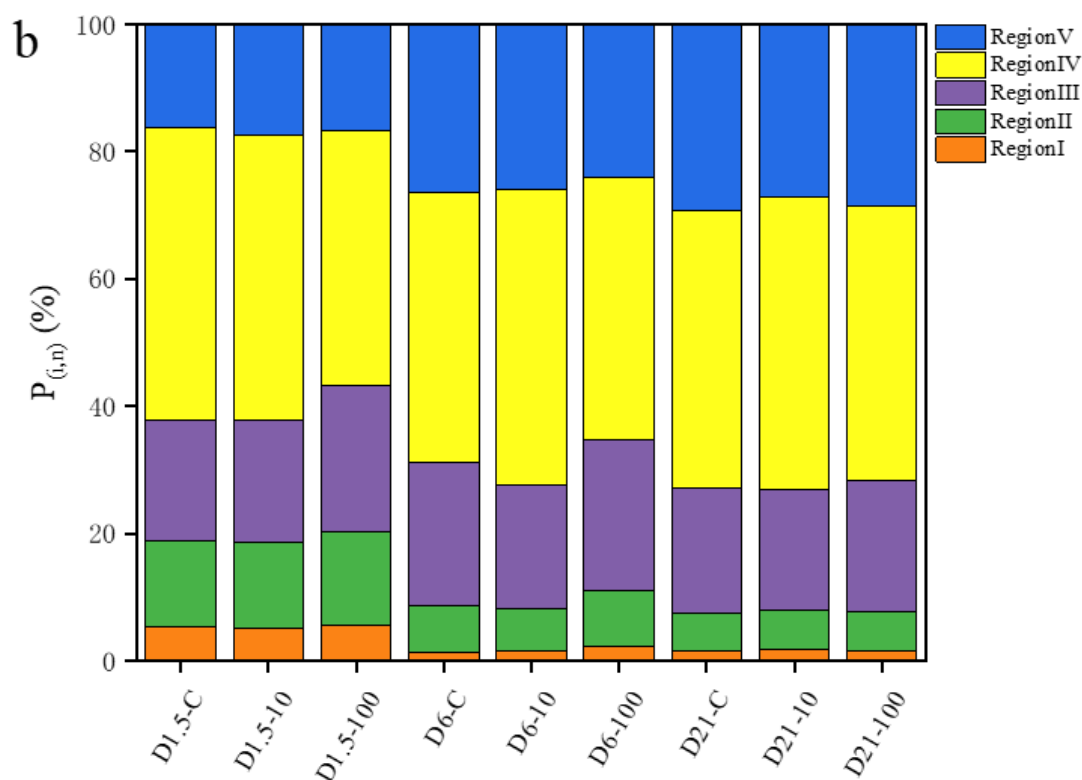

**Figure S3.** Normalized excitation-emission area volumes (a) and percent fluorescence response (b) of DOMs isolated from the composts. D 1.5-C, D 1.5-10 and D 1.5-100, the samples from the control, 10-mg/kg and 100-mg/kg groups on day 1.5, respectively; D 6-C, D 6-10 and D 6-100, the samples from the control, 10-mg/kg and 100-mg/kg groups on day 6, respectively; D 21-C, D 21-10 and D 21-100, the samples from the control, 10-mg/kg and 100-mg/kg groups on day 21, respectively

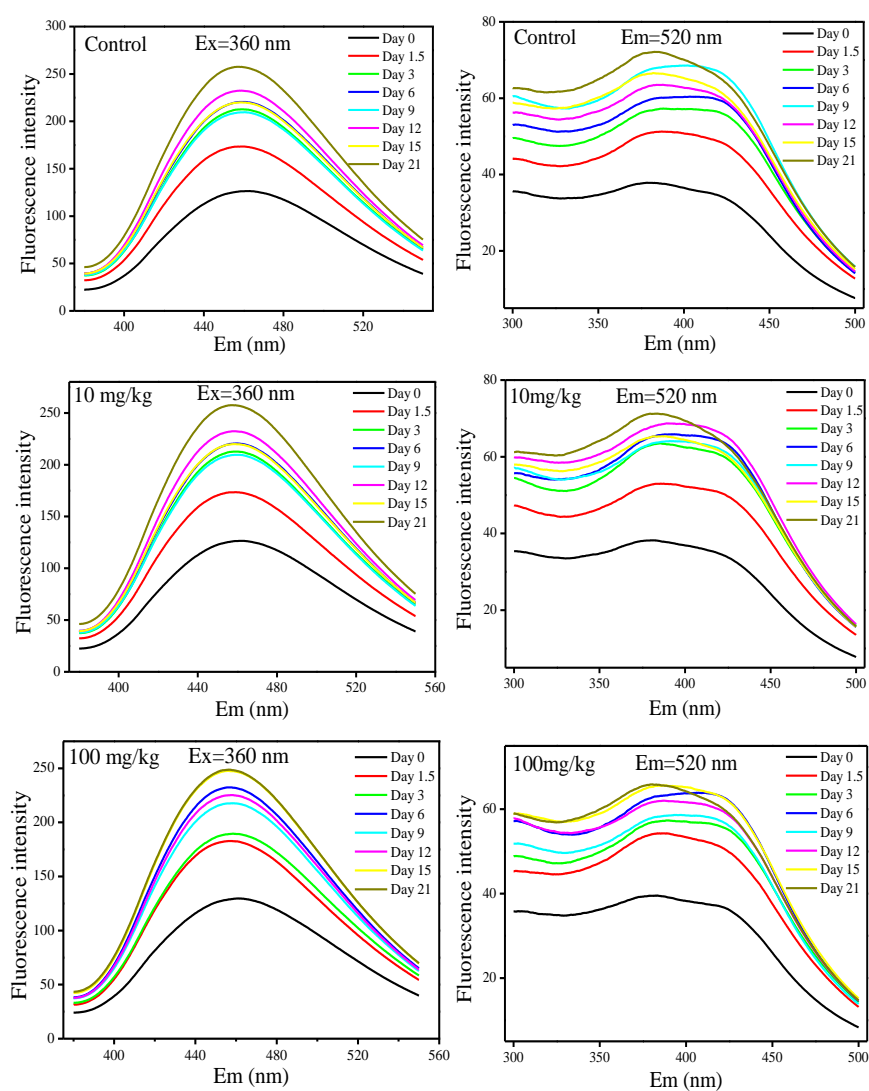

**Figure S4.** Emission (left) and Excitation (right) spectra of DOMs extracted from human feces aerobic composts.

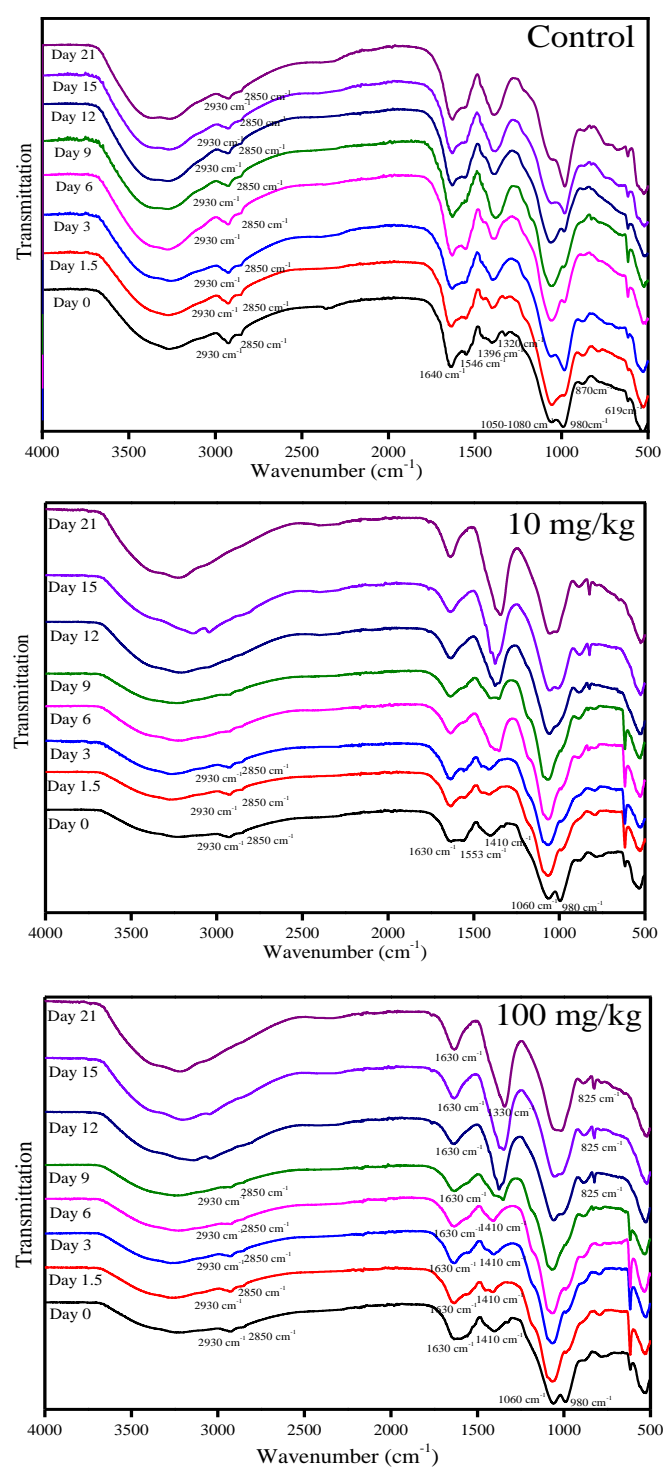

curve translate:  
 curve translate:  
 curve translate:  
 curve translate:  
 curve translate:  
 curve translate:  
 curve translate:

**Figure S5.** Changes in the FTIR spectra of DOMs during human feces aerobic composting.

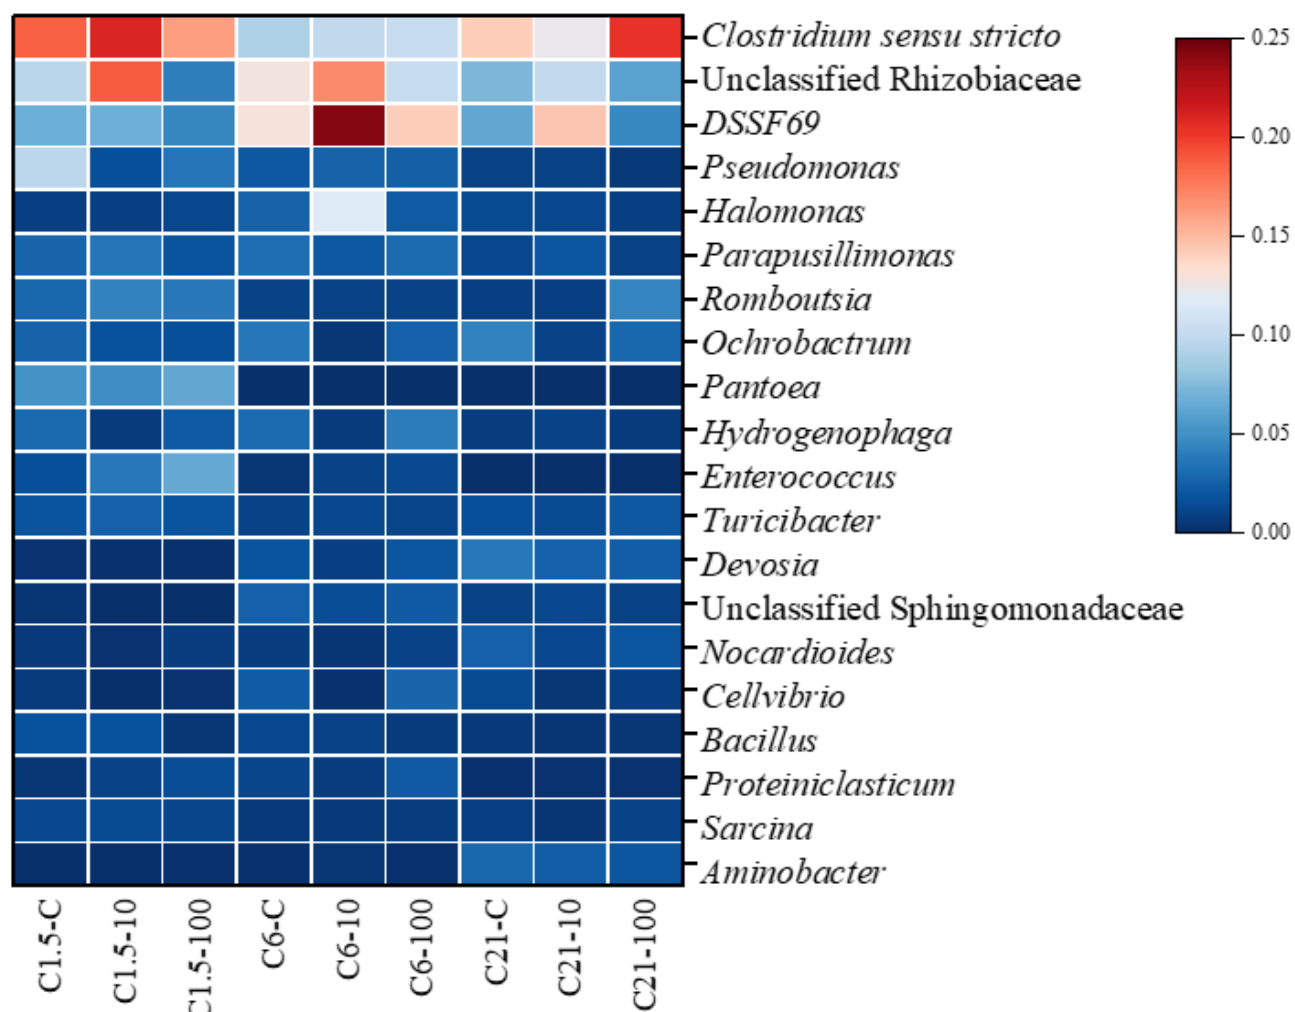

**Figure S6.** Heat map of top 20 abundant bacteria at the genus level in the composting samples. D 1.5-C, D 1.5-10 and D 1.5-100, the samples from control, 10-mg/kg and 100-mg/kg groups at day 1.5, respectively; D 6-C, D 6-10 and D 6-100, the samples from control, 10-mg/kg and 100-mg/kg groups at day 6, respectively; D 21-C, D 21-10 and D 21-100, the samples from control, 10-mg/kg and 100-mg/kg groups at day 21, respectively
